# Supplementary material
Source: HighWire-hosted journal article supplement (doi:10.1101/rna.080066.124)
Supplement: Supplemental_Table_S1.xlsx [file Supplemental_Table_S1.xlsx]

## Sheet: dge_top20
ref_gene_id

## Sheet: dte_top20
ref_gene_name

## Sheet: dge_HEK_NoKO_SMG5KD-KD_Z023-vs
ref_gene_id

## Sheet: dge_HEK_NoKO_SMG6+SMG7KD-KD_Z0
ref_gene_id

## Sheet: dge_HEK_SMG7KO_SMG5KD-KD_Z245-
ref_gene_id

## Sheet: dge_HEK_SMG7KO_SMG5KD-KD_Z319-
ref_gene_id

## Sheet: dge_HEK_SMG7KO_SMG6KD-KD_Z245-
ref_gene_id

## Sheet: dge_HEK_SMG7KO_SMG6KD-KD_Z319-
ref_gene_id

## Sheet: dge_HeLa_NoKO_SMG6+SMG7KD-KD_Z
ref_gene_id

## Sheet: dge_MCF7_NoKO_SMG6+SMG7KD-KD-v
ref_gene_id

[truncated: 10 more sheets: dge_U2OS_NoKO_SMG6+SMG7KD-KD-v, dte_HEK_NoKO_SMG5KD-KD_Z023-vs, dte_HEK_NoKO_SMG6+SMG7KD-KD_Z0, dte_HEK_SMG7KO_SMG5KD-KD_Z245-, dte_HEK_SMG7KO_SMG5KD-KD_Z319-, dte_HEK_SMG7KO_SMG6KD-KD_Z245-, dte_HEK_SMG7KO_SMG6KD-KD_Z319-, dte_HeLa_NoKO_SMG6+SMG7KD-KD_Z, dte_MCF7_NoKO_SMG6+SMG7KD-KD-v, dte_U2OS_NoKO_SMG6+SMG7KD-KD-v]
